# Supplementary material
Source: PubMed Central journal article supplement (PMC3088508)
Supplement: NIHMS288847-supplement-1_si_001.pdf [file NIHMS288847-supplement-1_si_001.pdf]

# [4Fe4S]<sup>2+</sup> Clusters Exhibit Ground-State Paramagnetism

Kresimir Rupnik, Chi Chung Lee, Yilin Hu, Markus W. Ribbe and Brian J. Hales

## Supporting Information

### Supplementary Materials and Methods

**Cell Growth and Protein Purification.** All *A. vinelandii* strains were grown in 180 L batches in a 200 L New Brunswick fermentor in Burke's minimal medium supplemented with 2 mM ammonium acetate. The growth rate was measured by cell density at 436 nm. After ammonia consumption, the cells were de-repressed for 3 h and subsequently harvested by using a flow-through centrifugal harvester (Cepa, Lahr/Schwarzwald, Germany). The cell paste was washed with 50 mM Tris-HCl (pH 8.0). All proteins used in this work were purified by methods described previously (*S1, S2*).

**Redox Titration Experiments.** Redox titration was performed at ambient temperature in a glove box under anaerobic conditions, using 20 mM Tris-HCl buffer (pH 8.0) that contained 55% glycerol. Redox mediator dyes, including methyl viologen, benzyl viologen, safranin O and phenosafranin, were added to a final concentration of 10  $\mu$ M. The  $\Delta nifB$  NifEN sample (10 mg/mL) was first reduced by excess sodium dithionite followed by oxidative titration with 1 mM potassium ferricyanide. Reduction potentials were monitored with a platinum working electrode and a saturated Ag/AgCl reference electrode and reported relative to normal hydrogen potential

(NHE). After reaching the desired potential, a 280  $\mu\text{L}$  aliquot was transferred to a calibrated EPR tube and frozen immediately in liquid nitrogen. In parallel, a 2.5 mL aliquot was quickly concentrated to  $\sim 70$  mg/mL, filled in a MCD sample cell and immediately frozen in a liquid-nitrogen/pentane slush. MCD and EPR measurements were performed as described below. The reduction potentials of the MCD and EPR samples were reported in Fig. 2A.

**EPR Spectroscopy.** All EPR spectra were recorded at perpendicular-mode by using a Bruker ESP 300  $E_z$  spectrophotometer (Bruker, Billerica, MA), interfaced with an Oxford Instruments ESR-9002 liquid helium continuous flow cryostat (Oxford Instruments, Oxon, U.K.). All spectra were recorded at 10 K by using a power of 50 mW, a frequency of 9.62 or 9.39 GHz, a gain of  $5 \times 10^4$ , a modulation frequency of 100 kHz and a modulation amplitude of 5 G, and 10 scans were averaged for one sample. Spin quantification of EPR signals was carried out as described earlier (S3). The relative spectral intensity of  $\Delta nifB$  NifEN in the reduced ( $S = 1/2$ , 2 spins per protein) or oxidized (EPR-silent) state was plotted against the reduction potential of the corresponding sample (see above) to generate a Nernst curve in Fig. 2A.

**MCD Spectroscopy.** Sample cells were constructed of optical quality quartz (170-2200 nm, 1 mm path length, Model BS-1-Q-1, Starna®, Model SUV R-1001). Each cuvette was cut to the appropriate dimensions to fit the sample holder (1.8 cm  $\times$  0.45 cm), resulting in a sample volume of  $\sim 160$   $\mu\text{L}$ . MCD spectra were recorded with a CD spectropolarimeter (Model J-710; Jasco, MD) interfaced with a superconducting magnet (Model Spectromag 400-7T; Oxford, U.K.) as previously described (S4). All spectral intensities have been corrected for depolarization effects. MCD magnetization curves were analyzed in Fig. 1D using a fit/simulation program created by Neese and Solomon (S5), where  $B$  = magnetic field,  $\beta$  = Bohr magneton,  $k$  = Boltzmann constant and  $T$  = absolute temperature.

## References

- S1. Ribbe, M. W.; Hu, Y.; Guo, M.; Schmid, B.; Burgess, B. K. *J. Biol. Chem.* **2002**, *277*, 23469-23476.
- S2. Bursey, E. H.; Burgess, B. K. *J. Biol. Chem.* **1998**, *273*, 29678-29685.
- S3. Hu, Y.; Fay, A. W.; Dos Santos, P. C.; Naderi, F.; Ribbe, M. W. *J. Biol. Chem.* **2004**, *279*, 54963-54971.
- S4. Broach, R. B., Rupnik, K., Hu, Y., Fay, A. W., Cotton, M., Ribbe, M. W., Hales, B. J. *Biochemistry* **2004**, *45*, 15039–15048.
- S5. Neese, F.; Solomon, E. I. *Inorg. Chem.* **1999**, *38*, 1847-1865
